# Supplementary material for: Regulatory T lymphocyte infiltration in metastatic breast cancer—an independent prognostic factor that changes with tumor progression
Source: PubMed Central journal article supplement (PMC7893927; doi:10.1186/s13058-021-01403-0), 2021-02-18
Supplement: 13058_2021_1403_MOESM2_ESM.pdf [file 13058_2021_1403_MOESM2_ESM.pdf]

Additional file 2

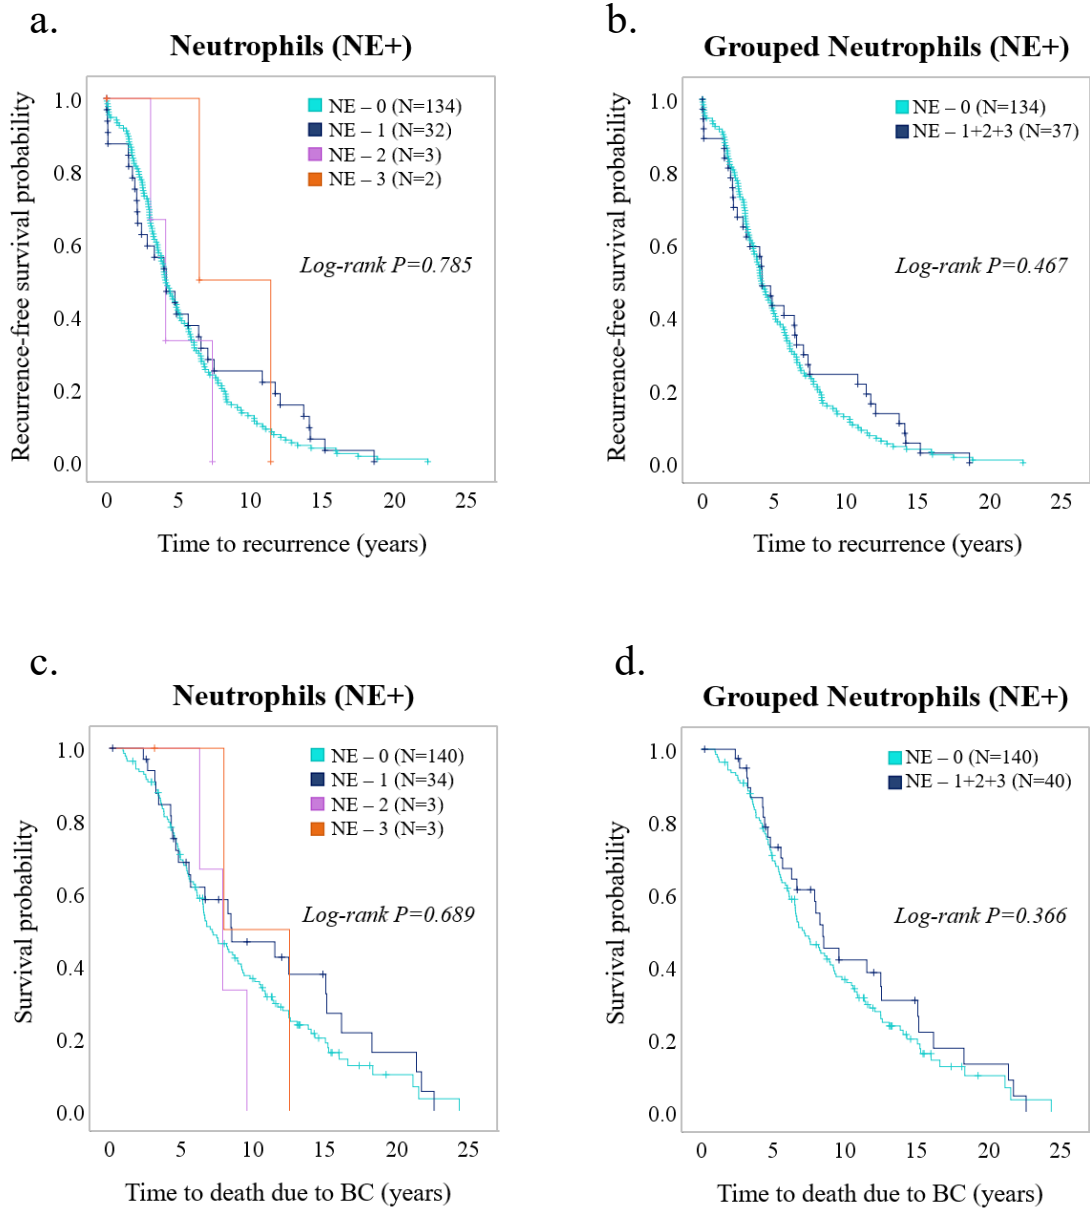

**Additional file 2.** Kaplan Meier plots (log-rank test) for **a,b.** recurrence-free survival and **c,d.** breast cancer-specific survival among patients with different infiltration levels of neutrophils (NE<sup>+</sup>) in primary tumor.
