# Supplementary material for: Regulatory T lymphocyte infiltration in metastatic breast cancer—an independent prognostic factor that changes with tumor progression
Source: PubMed Central journal article supplement (PMC7893927; doi:10.1186/s13058-021-01403-0), 2021-02-18
Supplement: 13058_2021_1403_MOESM3_ESM.pdf [file 13058_2021_1403_MOESM3_ESM.pdf]

### Additional file 3

**Additional file 3.** Correlation between macrophage (CD68<sup>+</sup>) and neutrophil (NE<sup>+</sup>) immune cell infiltration and clinicopathological features in primary breast cancer.

| Variable         | N (%)      | CD68 infiltration |    |    |    | R      | P            | N (%)      | NE infiltration |    |   |   | R      | P            |
|------------------|------------|-------------------|----|----|----|--------|--------------|------------|-----------------|----|---|---|--------|--------------|
|                  |            | 0                 | 1  | 2  | 3  |        |              |            | 0               | 1  | 2 | 3 |        |              |
| All              | 175 (100)  | 3                 | 55 | 98 | 19 |        |              | 180 (100)  | 140             | 34 | 3 | 3 |        |              |
| Age              |            |                   |    |    |    |        |              |            |                 |    |   |   |        |              |
| <50              | 80 (45.7)  | 1                 | 22 | 49 | 8  | -0.061 | 0.42         | 83 (46.1)  | 59              | 22 | 1 | 1 | -0.14  | 0.063        |
| ≥50              | 95 (54.3)  | 2                 | 33 | 49 | 11 |        |              | 97 (53.9)  | 81              | 12 | 2 | 2 |        |              |
| Tumor size       |            |                   |    |    |    |        |              |            |                 |    |   |   |        |              |
| ≤20 mm           | 72 (41.1)  | 1                 | 25 | 39 | 7  | 0.051  | 0.51         | 75 (41.7)  | 59              | 15 | 1 | 0 | 0.029  | 0.70         |
| >20 mm           | 102 (58.3) | 2                 | 30 | 58 | 12 |        |              | 104 (57.8) | 80              | 19 | 2 | 3 |        |              |
| Nodal metastasis |            |                   |    |    |    |        |              |            |                 |    |   |   |        |              |
| -                | 57 (32.6)  | 0                 | 15 | 35 | 7  | -0.085 | 0.27         | 59 (32.8)  | 44              | 14 | 0 | 1 | -0.038 | 0.62         |
| +                | 115 (65.7) | 2                 | 38 | 63 | 12 |        |              | 117 (65.0) | 92              | 20 | 3 | 2 |        |              |
| Ki67             |            |                   |    |    |    |        |              |            |                 |    |   |   |        |              |
| -                | 110 (62.9) | 3                 | 35 | 63 | 9  | 0.12   | 0.12         | 109 (60.6) | 91              | 17 | 1 | 0 | 0.16   | <b>0.04</b>  |
| +                | 56 (32.0)  | 0                 | 15 | 32 | 9  |        |              | 62 (34.4)  | 44              | 14 | 2 | 2 |        |              |
| NHG              |            |                   |    |    |    |        |              |            |                 |    |   |   |        |              |
| Grade 1/2        | 65 (37.1)  | 2                 | 23 | 37 | 3  | 0.14   | 0.074        | 64 (35.6)  | 51              | 11 | 1 | 1 | 0.033  | 0.68         |
| Grade 3          | 89 (50.9)  | 1                 | 26 | 48 | 14 |        |              | 94 (52.2)  | 72              | 20 | 1 | 1 |        |              |
| ER               |            |                   |    |    |    |        |              |            |                 |    |   |   |        |              |
| -                | 31 (17.7)  | 0                 | 8  | 15 | 8  | -0.15  | <b>0.05</b>  | 33 (18.3)  | 20              | 9  | 2 | 2 | -0.22  | <b>0.004</b> |
| +                | 138 (78.9) | 3                 | 43 | 82 | 10 |        |              | 142 (78.9) | 116             | 25 | 1 | 0 |        |              |
| PR               |            |                   |    |    |    |        |              |            |                 |    |   |   |        |              |
| -                | 71 (40.6)  | 1                 | 23 | 35 | 12 | -0.063 | 0.42         | 72 (40.0)  | 51              | 16 | 3 | 2 | -0.16  | <b>0.032</b> |
| +                | 97 (55.4)  | 2                 | 29 | 61 | 5  |        |              | 102 (56.7) | 85              | 17 | 0 | 0 |        |              |
| Luminal A        | 60 (34.3)  | 2                 | 20 | 36 | 2  | -0.17  | <b>0.037</b> | 62 (34.4)  | 54              | 8  | 0 | 0 | -0.17  | <b>0.027</b> |
| Luminal B        | 71 (40.6)  | 1                 | 19 | 43 | 8  | 0.048  | 0.55         | 73 (40.6)  | 57              | 15 | 1 | 0 | -0.003 | 0.97         |
| HER2             | 7 (4.0)    | 0                 | 0  | 6  | 1  | 0.13   | 0.11         | 9 (5.0)    | 6               | 3  | 0 | 0 | 0.062  | 0.43         |
| TN               | 22 (12.6)  | 0                 | 7  | 9  | 6  | 0.087  | 0.27         | 22 (12.2)  | 13              | 5  | 2 | 2 | 0.21   | <b>0.007</b> |

Abbreviations: N, number of patients included in analysis; R, correlation coefficient; Ki67, proliferation marker; NHG, Nottingham histologic grade; ER, estrogen receptor; PR, progesterone receptor; TN, triple negative. Spearman correlation, two-tailed *P*-value. Bold indicates *P*-value <0.05.
