# Supplementary material for: Regulatory T lymphocyte infiltration in metastatic breast cancer—an independent prognostic factor that changes with tumor progression
Source: PubMed Central journal article supplement (PMC7893927; doi:10.1186/s13058-021-01403-0), 2021-02-18
Supplement: 13058_2021_1403_MOESM4_ESM.pdf [file 13058_2021_1403_MOESM4_ESM.pdf]

## Additional file 4

**Additional file 4.** Correlation between immune cell populations within primary tumor.

|       |          | FOXP3        | CD68         | NE           |
|-------|----------|--------------|--------------|--------------|
| CD3   | R        | 0.54         | 0.43         | 0.20         |
|       | <i>p</i> | <b>0.000</b> | <b>0.000</b> | <b>0.007</b> |
|       | N        | 172          | 170          | 173          |
| FOXP3 | R        |              | 0.34         | 0.053        |
|       | <i>p</i> |              | <b>0.000</b> | 0.49         |
|       | N        |              | 172          | 174          |
| CD68  | R        |              |              | 0.23         |
|       | <i>p</i> |              |              | <b>0.003</b> |
|       | N        |              |              | 172          |

Abbreviations: R, correlation coefficient; N, number of patients included in analysis. Spearman correlation, two-tailed *P*-value. Bold indicates *P*-value <0.05.
