# Supplementary material for: Regulatory T lymphocyte infiltration in metastatic breast cancer—an independent prognostic factor that changes with tumor progression
Source: PubMed Central journal article supplement (PMC7893927; doi:10.1186/s13058-021-01403-0), 2021-02-18
Supplement: 13058_2021_1403_MOESM5_ESM.pdf [file 13058_2021_1403_MOESM5_ESM.pdf]

## Additional file 5

**Additional file 5.** Correlation between T lymphocyte (CD3<sup>+</sup>) and regulatory T lymphocyte (FOXP3<sup>+</sup>) infiltration and clinicopathological features in lymph node metastasis.

| Variable  | N (%)     | CD3 infiltration |    |    |    | R      | P     | N (%)     | FOXP3 infiltration |    |    |   | R      | P            |
|-----------|-----------|------------------|----|----|----|--------|-------|-----------|--------------------|----|----|---|--------|--------------|
|           |           | 0                | 1  | 2  | 3  |        |       |           | 0                  | 1  | 2  | 3 |        |              |
| All       | 81 (100)  | 5                | 21 | 40 | 15 |        |       | 80 (100)  | 26                 | 36 | 18 | 0 |        |              |
| Age       |           |                  |    |    |    |        |       |           |                    |    |    |   |        |              |
| <50       | 36 (44.4) | 2                | 11 | 18 | 5  | 0.10   | 0.38  | 36 (45.0) | 13                 | 13 | 10 | 0 | -0.013 | 0.91         |
| ≥50       | 45 (55.6) | 3                | 10 | 22 | 10 |        |       | 44 (55.0) | 13                 | 23 | 8  | 0 |        |              |
| Ki67      |           |                  |    |    |    |        |       |           |                    |    |    |   |        |              |
| -         | 52 (64.2) | 5                | 12 | 26 | 9  | 0.048  | 0.68  | 51 (63.8) | 22                 | 21 | 8  | 0 | 0.30   | <b>0.008</b> |
| +         | 25 (30.9) | 0                | 8  | 12 | 5  |        |       | 26 (32.5) | 4                  | 13 | 9  | 0 |        |              |
| ER        |           |                  |    |    |    |        |       |           |                    |    |    |   |        |              |
| -         | 16 (19.8) | 0                | 4  | 8  | 4  | -0.12  | 0.29  | 17 (21.3) | 4                  | 8  | 5  | 0 | -0.11  | 0.32         |
| +         | 64 (79.0) | 5                | 17 | 32 | 10 |        |       | 63 (78.8) | 22                 | 28 | 13 | 0 |        |              |
| PR        |           |                  |    |    |    |        |       |           |                    |    |    |   |        |              |
| -         | 42 (51.9) | 2                | 10 | 20 | 10 | -0.14  | 0.24  | 44 (55)   | 14                 | 17 | 13 | 0 | -0.12  | 0.30         |
| +         | 34 (42.0) | 3                | 9  | 18 | 4  |        |       | 33 (41.3) | 11                 | 18 | 4  | 0 |        |              |
| Luminal A | 42 (51.9) | 5                | 9  | 22 | 6  | -0.062 | 0.59  | 42 (52.5) | 18                 | 17 | 7  | 0 | -0.24  | <b>0.037</b> |
| Luminal B | 20 (24.7) | 0                | 8  | 9  | 3  | -0.040 | 0.73  | 19 (23.8) | 4                  | 10 | 5  | 0 | 0.13   | 0.27         |
| HER2      | 4 (4.9)   | 0                | 2  | 2  | 0  | -0.093 | 0.43  | 5 (6.3)   | 2                  | 3  | 0  | 0 | -0.10  | 0.38         |
| TN        | 10 (12.3) | 0                | 2  | 4  | 4  | 0.21   | 0.076 | 10 (12.5) | 1                  | 4  | 5  | 0 | 0.26   | <b>0.021</b> |

Abbreviations: N, number of patients included in analysis; R, correlation coefficient; Ki67, proliferation marker; ER, estrogen receptor; PR, progesterone receptor; TN, triple negative. Spearman correlation, two-tailed *P*-value. Bold indicates *P*-value <0.05.
