# Supplementary material for: Regulatory T lymphocyte infiltration in metastatic breast cancer—an independent prognostic factor that changes with tumor progression
Source: PubMed Central journal article supplement (PMC7893927; doi:10.1186/s13058-021-01403-0), 2021-02-18
Supplement: 13058_2021_1403_MOESM6_ESM.pdf [file 13058_2021_1403_MOESM6_ESM.pdf]

## Additional file 6

**Additional file 6.** Location of distant metastases.

| <b>Metastatic site</b>        | <b>N</b> |
|-------------------------------|----------|
| Cutaneous/Subcutaneous        | 8        |
| Bones                         | 7        |
| Liver                         | 7        |
| Distant lymph node metastases | 3        |
| Local                         | 4        |
| Brain                         | 1        |
| Ureter                        | 1        |
| Vagina                        | 1        |
| Muscle                        | 1        |
| Unknown                       | 1        |

Abbreviations: N, number of patients.
