# Supplementary material for: Regulatory T lymphocyte infiltration in metastatic breast cancer—an independent prognostic factor that changes with tumor progression
Source: PubMed Central journal article supplement (PMC7893927; doi:10.1186/s13058-021-01403-0), 2021-02-18
Supplement: 13058_2021_1403_MOESM7_ESM.pdf [file 13058_2021_1403_MOESM7_ESM.pdf]

## Additional file 7

**Additional file 7.** Correlation between T lymphocyte (CD3<sup>+</sup>) and regulatory T lymphocyte (FOXP3<sup>+</sup>) infiltration and clinicopathological features in distant metastasis.

| Variable  | N (%)     | CD3 infiltration |    |    |   | R      | P    | N (%)     | FOXP3 infiltration |   |    |   | R      | P    |
|-----------|-----------|------------------|----|----|---|--------|------|-----------|--------------------|---|----|---|--------|------|
|           |           | 0                | 1  | 2  | 3 |        |      |           | 0                  | 1 | 2  | 3 |        |      |
| All       | 34 (100)  | 4                | 11 | 15 | 4 |        |      | 34 (100)  | 14                 | 8 | 12 | 0 |        |      |
| Age       |           |                  |    |    |   |        |      |           |                    |   |    |   |        |      |
| <50       | 19 (55.9) | 3                | 7  | 7  | 2 | 0.19   | 0.29 | 19 (55.9) | 7                  | 5 | 7  | 0 | -0.078 | 0.66 |
| ≥50       | 15 (44.1) | 1                | 4  | 8  | 2 |        |      | 15 (44.1) | 7                  | 3 | 5  | 0 |        |      |
| Ki67      |           |                  |    |    |   |        |      |           |                    |   |    |   |        |      |
| -         | 17 (50.0) | 1                | 8  | 7  | 1 | 0.072  | 0.74 | 17 (50.0) | 5                  | 6 | 6  | 0 | -0.028 | 0.90 |
| +         | 7 (20.6)  | 1                | 2  | 3  | 1 |        |      | 7 (20.6)  | 3                  | 1 | 3  | 0 |        |      |
| ER        |           |                  |    |    |   |        |      |           |                    |   |    |   |        |      |
| -         | 9 (26.5)  | 1                | 4  | 3  | 1 | 0.035  | 0.87 | 9 (26.5)  | 3                  | 3 | 3  | 0 | 0.034  | 0.87 |
| +         | 17 (50.0) | 2                | 6  | 8  | 1 |        |      | 17 (50.0) | 6                  | 4 | 7  | 0 |        |      |
| PR        |           |                  |    |    |   |        |      |           |                    |   |    |   |        |      |
| -         | 21 (61.8) | 2                | 9  | 8  | 2 | -0.01  | 0.96 | 21 (61.8) | 8                  | 5 | 8  | 0 | 0.00   | 1.00 |
| +         | 3 (8.8)   | 1                | 0  | 2  | 0 |        |      | 3 (8.8)   | 1                  | 1 | 1  | 0 |        |      |
| Luminal A | 12 (35.3) | 1                | 4  | 6  | 1 | 0.20   | 0.38 | 12 (35.3) | 4                  | 3 | 5  | 0 | -0.008 | 0.97 |
| Luminal B | 3 (8.8)   | 0                | 2  | 1  | 0 | -0.091 | 0.69 | 3 (8.8)   | 1                  | 1 | 1  | 0 | -0.044 | 0.84 |
| HER2      | 2 (5.9)   | 1                | 0  | 1  | 0 | -0.14  | 0.55 | 2 (5.9)   | 1                  | 0 | 1  | 0 | -0.027 | 0.91 |
| TN        | 5 (14.7)  | 0                | 3  | 2  | 0 | -0.065 | 0.77 | 5 (14.7)  | 1                  | 2 | 2  | 0 | 0.064  | 0.78 |

Abbreviations: N, number of patients included in analysis; R, correlation coefficient; Ki67, proliferation marker; ER, estrogen receptor; PR, progesteron receptor; TN, triple negative. Spearman correlation, two-tailed *P*-value. Bold indicates *P*-value <0.05.
